# Supplementary material for: Effects of vitamin D on inflammatory and oxidative stress responses of human bronchial epithelial cells exposed to particulate matter
Source: PubMed Central journal article supplement (PMC6114286; doi:10.1371/journal.pone.0200040), 2018-08-29
Supplement: pone.0200040.s001.pdf [file pone.0200040.s001.pdf]

**S1 Table: Taqman primer probesets**

| <b>Gene</b>    | <b>Fluorescent Label</b> | <b>Primer – Probeset ID</b> |
|----------------|--------------------------|-----------------------------|
| <i>18S</i>     | VIC                      | Hs9999990_s1                |
| <i>CYP24A1</i> | FAM                      | Hs00167999_m1               |
| <i>CYP27B1</i> | FAM                      | Hs00168017_m1               |
| <i>CAMP</i>    | FAM                      | Hs001891038_m1              |
| <i>CSF2</i>    | FAM                      | Hs00929873_m1               |
| <i>CXCL10</i>  | FAM                      | Hs01124251_g1               |
| <i>G6PD</i>    | FAM                      | Hs00166169_m1               |
| <i>IL6</i>     | FAM                      | Hs00985639_m1               |
| <i>IL8</i>     | FAM                      | Hs00174103_m1               |
| <i>IL24</i>    | FAM                      | Hs01114274_m1               |
| <i>TGFB2</i>   | FAM                      | Hs00234244_m1               |
| <i>VDR</i>     | FAM                      | Hs01045846_m1               |
