# Supplementary material for: Effects of vitamin D on inflammatory and oxidative stress responses of human bronchial epithelial cells exposed to particulate matter
Source: PubMed Central journal article supplement (PMC6114286; doi:10.1371/journal.pone.0200040), 2018-08-29
Supplement: pone.0200040.s002.pdf [file pone.0200040.s002.pdf]

**S2 Table: Genes showing differential regulation by both NIST stimulation and vitamin D**

| Gene ID   | Direction  |             |                                                      | Direction   |             |                      | Direction   |             |                                                        |
|-----------|------------|-------------|------------------------------------------------------|-------------|-------------|----------------------|-------------|-------------|--------------------------------------------------------|
|           | p value    | Fold-Change | Control vs. 1,25(OH) <sub>2</sub> D <sub>3</sub>     | p value     | Fold-Change | Control vs. NIST     | p value     | Fold-Change | NIST vs. NIST+1,25(OH) <sub>2</sub> D <sub>3</sub>     |
| IL1RL1    | 0.0465043  | -2.10531    | Control down vs 1,25(OH) <sub>2</sub> D <sub>3</sub> | 0.168072    | -1.62235    | Control down vs NIST | 0.011141    | -2.79324    | NIST down vs NIST+1,25(OH) <sub>2</sub> D <sub>3</sub> |
| G0S2      | 0.00914142 | -1.90065    | Control down vs 1,25(OH) <sub>2</sub> D <sub>3</sub> | 0.00309638  | -2.1762     | Control down vs NIST | 0.000624146 | -2.70591    | NIST down vs NIST+1,25(OH) <sub>2</sub> D <sub>3</sub> |
| KLK6      | 0.00179259 | -1.86993    | Control down vs 1,25(OH) <sub>2</sub> D <sub>3</sub> | 0.0245908   | -1.47087    | Control down vs NIST | 0.000123887 | -2.50339    | NIST down vs NIST+1,25(OH) <sub>2</sub> D <sub>3</sub> |
| TGFB2     | 0.0270176  | -1.61114    | Control down vs 1,25(OH) <sub>2</sub> D <sub>3</sub> | 0.00894347  | 1.82264     | Control up vs NIST   | 0.00282454  | -2.08522    | NIST down vs NIST+1,25(OH) <sub>2</sub> D <sub>3</sub> |
| CLDN7     | 0.298211   | -1.37284    | Control down vs 1,25(OH) <sub>2</sub> D <sub>3</sub> | 0.0601412   | -1.85293    | Control down vs NIST | 0.0678588   | -1.81381    | NIST down vs NIST+1,25(OH) <sub>2</sub> D <sub>3</sub> |
| SERPINB1  | 0.0084738  | -1.64167    | Control down vs 1,25(OH) <sub>2</sub> D <sub>3</sub> | 0.000730376 | -2.09662    | Control down vs NIST | 0.00330487  | -1.79556    | NIST down vs NIST+1,25(OH) <sub>2</sub> D <sub>3</sub> |
| CLCF1     | 0.0804403  | -1.29685    | Control down vs 1,25(OH) <sub>2</sub> D <sub>3</sub> | 0.0176374   | -1.4661     | Control down vs NIST | 0.00192102  | -1.76969    | NIST down vs NIST+1,25(OH) <sub>2</sub> D <sub>3</sub> |
| TINAGL1   | 0.0560214  | -1.53893    | Control down vs 1,25(OH) <sub>2</sub> D <sub>3</sub> | 0.0528185   | -1.54989    | Control down vs NIST | 0.0204494   | -1.73685    | NIST down vs NIST+1,25(OH) <sub>2</sub> D <sub>3</sub> |
| CALML3    | 0.0473789  | -1.55187    | Control down vs 1,25(OH) <sub>2</sub> D <sub>3</sub> | 0.00746459  | 1.92993     | Control up vs NIST   | 0.0193797   | -1.72279    | NIST down vs NIST+1,25(OH) <sub>2</sub> D <sub>3</sub> |
| COL1A1    | 0.00843668 | -1.67318    | Control down vs 1,25(OH) <sub>2</sub> D <sub>3</sub> | 0.0181665   | 1.55538     | Control up vs NIST   | 0.00978423  | -1.6495     | NIST down vs NIST+1,25(OH) <sub>2</sub> D <sub>3</sub> |
| FNDC4     | 0.0171438  | -1.36635    | Control down vs 1,25(OH) <sub>2</sub> D <sub>3</sub> | 0.00562058  | -1.47242    | Control down vs NIST | 0.00116336  | -1.64913    | NIST down vs NIST+1,25(OH) <sub>2</sub> D <sub>3</sub> |
| TMEM132A  | 0.078646   | -1.54403    | Control down vs 1,25(OH) <sub>2</sub> D <sub>3</sub> | 0.0520706   | -1.63239    | Control down vs NIST | 0.0501363   | -1.6407     | NIST down vs NIST+1,25(OH) <sub>2</sub> D <sub>3</sub> |
| ZNF185    | 0.00548689 | -1.56017    | Control down vs 1,25(OH) <sub>2</sub> D <sub>3</sub> | 0.0200145   | -1.41295    | Control down vs NIST | 0.00568852  | -1.55575    | NIST down vs NIST+1,25(OH) <sub>2</sub> D <sub>3</sub> |
| LOC644774 | 0.23192    | -1.54818    | Control down vs 1,25(OH) <sub>2</sub> D <sub>3</sub> | 0.201853    | -1.5991     | Control down vs NIST | 0.240484    | -1.53497    | NIST down vs NIST+1,25(OH) <sub>2</sub> D <sub>3</sub> |
| HSD17B2   | 0.0212805  | -1.3591     | Control down vs 1,25(OH) <sub>2</sub> D <sub>3</sub> | 5.60E-06    | -2.84148    | Control down vs NIST | 0.00370075  | -1.53464    | NIST down vs NIST+1,25(OH) <sub>2</sub> D <sub>3</sub> |

|                  |            |          |                             |            |          |                      |            |          |                               |
|------------------|------------|----------|-----------------------------|------------|----------|----------------------|------------|----------|-------------------------------|
| CYBA             | 0.228216   | -1.37571 | Control down vs 1,25(OH)2D3 | 0.20045    | -1.40608 | Control down vs NIST | 0.126281   | -1.51538 | NIST down vs NIST+1,25(OH)2D3 |
| LOC732007        | 0.297057   | -1.40272 | Control down vs 1,25(OH)2D3 | 0.21826    | -1.49883 | Control down vs NIST | 0.218839   | -1.498   | NIST down vs NIST+1,25(OH)2D3 |
| LHFPL2           | 0.156393   | -1.22409 | Control down vs 1,25(OH)2D3 | 0.0188548  | -1.45298 | Control down vs NIST | 0.0145626  | -1.48348 | NIST down vs NIST+1,25(OH)2D3 |
| TNFRSF12A        | 0.283917   | -1.52121 | Control down vs 1,25(OH)2D3 | 0.096998   | -1.97767 | Control down vs NIST | 0.319492   | -1.4739  | NIST down vs NIST+1,25(OH)2D3 |
| FUT3             | 0.268488   | -1.1781  | Control down vs 1,25(OH)2D3 | 0.0120253  | -1.54603 | Control down vs NIST | 0.0234616  | -1.46016 | NIST down vs NIST+1,25(OH)2D3 |
| LOC653888        | 0.22172    | -1.49047 | Control down vs 1,25(OH)2D3 | 0.167983   | -1.57748 | Control down vs NIST | 0.260954   | -1.43999 | NIST down vs NIST+1,25(OH)2D3 |
| SLPI             | 0.29415    | -1.26871 | Control down vs 1,25(OH)2D3 | 0.031599   | -1.72139 | Control down vs NIST | 0.125053   | -1.43523 | NIST down vs NIST+1,25(OH)2D3 |
| PGAM1            | 0.299795   | -1.38669 | Control down vs 1,25(OH)2D3 | 0.276903   | -1.41045 | Control down vs NIST | 0.256957   | -1.43284 | NIST down vs NIST+1,25(OH)2D3 |
| SEMA6A           | 0.167059   | -1.22372 | Control down vs 1,25(OH)2D3 | 0.0124078  | 1.51964  | Control up vs NIST   | 0.0258794  | -1.43019 | NIST down vs NIST+1,25(OH)2D3 |
| PTAFR            | 0.244684   | -1.2013  | Control down vs 1,25(OH)2D3 | 0.028395   | -1.46842 | Control down vs NIST | 0.0406266  | -1.42192 | NIST down vs NIST+1,25(OH)2D3 |
| MMP9             | 0.893793   | 1.03243  | Control up vs 1,25(OH)2D3   | 0.0288699  | -1.82859 | Control down vs NIST | 0.171049   | -1.41294 | NIST down vs NIST+1,25(OH)2D3 |
| SPRR2G           | 0.62754    | 1.09394  | Control up vs 1,25(OH)2D3   | 0.00640393 | -1.87983 | Control down vs NIST | 0.0881717  | 1.40746  | NIST up vs NIST+1,25(OH)2D3   |
| SPRR2C           | 0.264261   | 1.1972   | Control up vs 1,25(OH)2D3   | 0.0010141  | -2.05692 | Control down vs NIST | 0.048364   | 1.41205  | NIST up vs NIST+1,25(OH)2D3   |
| MX2              | 0.62258    | 1.21054  | Control up vs 1,25(OH)2D3   | 0.142998   | -1.82519 | Control down vs NIST | 0.365557   | 1.42939  | NIST up vs NIST+1,25(OH)2D3   |
| SPRR2F           | 0.00102203 | 1.57848  | Control up vs 1,25(OH)2D3   | 2.24E-06   | -2.75387 | Control down vs NIST | 0.00433959 | 1.4365   | NIST up vs NIST+1,25(OH)2D3   |
| SNORA79          | 0.388657   | 1.36502  | Control up vs 1,25(OH)2D3   | 0.161591   | 1.6886   | Control up vs NIST   | 0.318605   | 1.43718  | NIST up vs NIST+1,25(OH)2D3   |
| TOP2A            | 0.352653   | 1.12965  | Control up vs 1,25(OH)2D3   | 0.0110559  | 1.48653  | Control up vs NIST   | 0.016798   | 1.43946  | NIST up vs NIST+1,25(OH)2D3   |
| IFIT2            | 0.890007   | -1.05781 | Control down vs 1,25(OH)2D3 | 0.218496   | -1.68637 | Control down vs NIST | 0.376849   | 1.4437   | NIST up vs NIST+1,25(OH)2D3   |
| LOC100132<br>240 | 0.333111   | 1.29278  | Control up vs 1,25(OH)2D3   | 0.158863   | 1.47065  | Control up vs NIST   | 0.175731   | 1.44627  | NIST up vs NIST+1,25(OH)2D3   |

|          |           |         |                           |             |          |                      |            |         |                             |
|----------|-----------|---------|---------------------------|-------------|----------|----------------------|------------|---------|-----------------------------|
| S100A7A  | 0.69075   | 1.09231 | Control up vs 1,25(OH)2D3 | 0.0021643   | -2.48868 | Control down vs NIST | 0.109224   | 1.4651  | NIST up vs NIST+1,25(OH)2D3 |
| CDC45L   | 0.172259  | 1.28224 | Control up vs 1,25(OH)2D3 | 0.0716714   | 1.40797  | Control up vs NIST   | 0.0453846  | 1.47577 | NIST up vs NIST+1,25(OH)2D3 |
| SPRR2E   | 0.246472  | 1.24643 | Control up vs 1,25(OH)2D3 | 4.83E-05    | -3.62496 | Control down vs NIST | 0.0529816  | 1.48542 | NIST up vs NIST+1,25(OH)2D3 |
| IFI6     | 0.805071  | 1.09868 | Control up vs 1,25(OH)2D3 | 0.223558    | -1.62254 | Control down vs NIST | 0.305634   | 1.49506 | NIST up vs NIST+1,25(OH)2D3 |
| SLC7A11  | 0.419671  | 1.16406 | Control up vs 1,25(OH)2D3 | 0.000213763 | -2.9153  | Control down vs NIST | 0.0510411  | 1.49799 | NIST up vs NIST+1,25(OH)2D3 |
| IL6      | 0.049738  | 1.42547 | Control up vs 1,25(OH)2D3 | 0.00121734  | -2.06736 | Control down vs NIST | 0.0279799  | 1.50594 | NIST up vs NIST+1,25(OH)2D3 |
| IFIT1    | 0.989147  | 1.00702 | Control up vs 1,25(OH)2D3 | 0.146043    | -2.21568 | Control down vs NIST | 0.42431    | 1.5196  | NIST up vs NIST+1,25(OH)2D3 |
| PBK      | 0.314518  | 1.16635 | Control up vs 1,25(OH)2D3 | 0.0238827   | 1.4798   | Control up vs NIST   | 0.0154321  | 1.53816 | NIST up vs NIST+1,25(OH)2D3 |
| IFI44    | 0.53743   | 1.24944 | Control up vs 1,25(OH)2D3 | 0.162021    | -1.69744 | Control down vs NIST | 0.231968   | 1.56083 | NIST up vs NIST+1,25(OH)2D3 |
| KIAA1199 | 0.0166052 | 1.68302 | Control up vs 1,25(OH)2D3 | 0.085661    | 1.40815  | Control up vs NIST   | 0.0306761  | 1.57463 | NIST up vs NIST+1,25(OH)2D3 |
| SPRR1A   | 0.138988  | 1.21832 | Control up vs 1,25(OH)2D3 | 0.000261189 | -2.02378 | Control down vs NIST | 0.00439874 | 1.58243 | NIST up vs NIST+1,25(OH)2D3 |
| IL24     | 0.0394541 | 1.31655 | Control up vs 1,25(OH)2D3 | 3.79E-06    | -3.11063 | Control down vs NIST | 0.00117518 | 1.7043  | NIST up vs NIST+1,25(OH)2D3 |
| IFI44L   | 0.632328  | 1.2925  | Control up vs 1,25(OH)2D3 | 0.240531    | -1.91763 | Control down vs NIST | 0.297626   | 1.7732  | NIST up vs NIST+1,25(OH)2D3 |
| RASD1    | 0.0615367 | 1.4049  | Control up vs 1,25(OH)2D3 | 0.0115027   | -1.65471 | Control down vs NIST | 0.00211878 | 1.96993 | NIST up vs NIST+1,25(OH)2D3 |
| CXCL10   | 0.769044  | 1.12621 | Control up vs 1,25(OH)2D3 | 0.0650825   | -2.28168 | Control down vs NIST | 0.112008   | 1.99732 | NIST up vs NIST+1,25(OH)2D3 |

Gene expression fold-changes in a transcription microarray of HBECs cultured for 24 hours with/without 50µg/ml NIST stimulation in the presence/absence of 100nM 1,25(OH)<sub>2</sub>D<sub>3</sub>. Short-list of genes showing both differential expression with NIST stimulation (fold change  $\geq \pm 1.4$ ) and differential expression with vitamin D treatment in presence of NIST stimulation (fold change  $\geq \pm 1.4$ ).
